# Supplementary material
Source: publisher figshare collection journal article supplement (https://f1000.figshare.com/ndownloader/files/170283)
Supplement: Supplementary file 1 [file 170283]

miRNA Name	Plasma	PBMCs	Platelets	Whole Blood	Serum
GAPDH	N/A	4.87	-1.35	4.24	-1.16
Hs-RNU5A-1	3.31	1.34	0.85	2.48	0.73
Hs-RNU6B-2	3.63	2.48	1.97	2.41	0.95
Hs-SCARNA17-1	4.24	7.56	5.44	8.48	1.97
Hs-SNORA73A-1	6.06	4.60	5.48	4.88	-5.43
Hs-SNORD25-1	4.68	6.94	5.96	7.96	2.23
Hs-let-7a*-1	N/A	15.44	N/A	N/A	N/A
Hs-let-7a-1	N/A	6.42	-0.33	4.26	1.68
Hs-let-7a-2*-1	N/A	14.30	N/A	13.78	N/A
Hs-let-7b*-1	-1.22	8.47	0.59	8.20	-0.77
Hs-let-7b-1	N/A	6.14	-0.90	3.72	2.58
Hs-let-7c*-1	N/A	15.06	N/A	14.13	N/A
Hs-let-7c-1	N/A	6.27	-0.63	3.47	2.31
Hs-let-7d*-1	4.25	9.46	3.59	8.83	4.33
Hs-let-7d-2	N/A	7.64	0.26	5.74	N/A
Hs-let-7e*-1	N/A	13.40	N/A	13.17	N/A
Hs-let-7e-2	N/A	5.77	-1.38	4.10	1.57
Hs-let-7f-1	N/A	13.19	6.58	12.65	N/A
Hs-let-7f-1*-1	1.27	9.82	3.32	9.74	0.23
Hs-let-7f-2*-1	N/A	N/A	N/A	N/A	N/A
Hs-let-7g*-1	5.79	11.32	6.05	7.22	5.60
Hs-let-7g-2	N/A	6.76	-0.75	6.22	N/A
Hs-let-7i*-1	N/A	14.84	N/A	11.57	N/A
Hs-let-7i-1	N/A	6.79	-1.07	5.43	N/A
Hs-miR-1-2	N/A	N/A	N/A	N/A	N/A
Hs-miR-7-1	N/A	N/A	N/A	12.96	N/A
Hs-miR-7-1*-1	N/A	13.50	N/A	12.05	N/A
Hs-miR-7-2*-1	N/A	6.65	-1.54	5.60	-3.62
Hs-miR-9*-1	5.94	13.20	7.22	12.86	N/A
Hs-miR-9-1	N/A	N/A	N/A	N/A	N/A
Hs-miR-10a*-1	5.56	11.72	N/A	10.53	5.24
Hs-miR-10a-1	N/A	15.50	7.10	14.98	N/A
Hs-miR-10b*-1	5.71	12.14	N/A	10.68	5.92
Hs-miR-10b-2	N/A	12.51	N/A	13.56	N/A
Hs-miR-15a*-1	N/A	10.39	5.78	8.70	N/A
Hs-miR-15a-1	N/A	10.94	1.57	8.92	N/A
Hs-miR-15b*-1	N/A	11.21	7.79	10.08	N/A
Hs-miR-15b-2	N/A	6.58	-0.77	3.15	2.42
Hs-miR-16-1	N/A	5.97	-3.04	2.00	-0.49
Hs-miR-16-1*-1	N/A	13.45	N/A	12.96	N/A
Hs-miR-16-2*-1	N/A	15.24	N/A	N/A	N/A
Hs-miR-17-1	N/A	10.58	-0.13	8.55	N/A
Hs-miR-17-3p-1	N/A	13.07	6.20	11.75	N/A
Hs-miR-18a*-1	N/A	13.56	5.42	7.99	N/A
Hs-miR-18a-1	N/A	15.13	4.61	14.29	N/A
Hs-miR-18b*-1	N/A	14.04	N/A	13.37	N/A
Hs-miR-19a*-1	N/A	N/A	N/A	N/A	N/A
Hs-miR-19a-1	N/A	16.34	5.52	16.14	N/A
Hs-miR-19b-1	N/A	16.40	5.85	16.22	N/A
Hs-miR-19b-1*-1	N/A	12.54	N/A	12.47	N/A
Hs-miR-19b-2*-1	N/A	N/A	N/A	N/A	N/A
Hs-miR-20a*-1	N/A	10.28	N/A	11.20	N/A
Hs-miR-20a-1	N/A	10.67	0.19	8.76	2.12
Hs-miR-20b*-1	N/A	12.84	N/A	12.20	N/A
Hs-miR-20b-1	N/A	11.88	1.69	9.82	N/A
Hs-miR-21*-1	N/A	11.98	5.03	11.48	N/A
Hs-miR-21-2	N/A	8.15	0.67	11.24	N/A
Hs-miR-22*-1	4.07	9.64	4.98	8.08	4.44
Hs-miR-22-1	N/A	9.01	-1.21	5.97	N/A
Hs-miR-23a*-1	N/A	11.26	4.67	10.28	N/A
Hs-miR-23a-1	N/A	4.96	-2.91	6.27	N/A
Hs-miR-23b*-1	N/A	13.23	5.97	13.64	N/A
Hs-miR-24-1	N/A	7.57	-2.63	9.42	N/A
Hs-miR-24-1*-1	N/A	N/A	N/A	N/A	N/A
Hs-miR-24-2*-1	N/A	14.27	5.99	13.59	N/A
Hs-miR-25*-1	N/A	14.59	N/A	13.66	N/A
Hs-miR-25-1	N/A	7.18	0.17	1.62	N/A
Hs-miR-26a-1	N/A	11.98	3.51	11.89	N/A
Hs-miR-26a-1*-1	N/A	14.18	N/A	12.82	N/A
Hs-miR-26a-2*-1	N/A	N/A	N/A	N/A	N/A
Hs-miR-26b*-1	3.33	8.20	3.94	7.15	2.25
Hs-miR-26b-1	N/A	11.36	3.38	11.69	N/A
Hs-miR-27a*-1	N/A	13.13	N/A	11.37	N/A
Hs-miR-27a-1	N/A	8.15	-0.77	11.02	N/A
Hs-miR-27b*-1	N/A	12.06	6.19	10.86	N/A
Hs-miR-27b-1	N/A	8.00	-1.39	10.89	N/A
Hs-miR-28-1	N/A	10.88	3.24	12.28	N/A
Hs-miR-28-3p-1	N/A	11.58	6.94	10.25	N/A
Hs-miR-29a*-1	5.51	12.00	5.60	11.09	5.66
Hs-miR-29a-1	N/A	5.68	0.70	8.44	N/A
Hs-miR-29b-1	N/A	8.80	2.77	10.13	N/A
Hs-miR-29b-1*-1	N/A	10.86	4.61	9.82	N/A
Hs-miR-29b-2*-1	N/A	14.67	N/A	12.81	N/A
Hs-miR-29c*-1	-1.62	8.30	1.32	6.97	-0.74
Hs-miR-29c-1	N/A	5.05	-0.28	7.69	N/A
Hs-miR-30a*-1	4.43	10.05	4.89	9.32	5.23
Hs-miR-30a-5p-1	N/A	8.74	0.19	7.82	N/A
Hs-miR-30b*-1	N/A	9.08	3.27	8.69	N/A
Hs-miR-30b-1	N/A	11.38	3.55	9.60	N/A
Hs-miR-30c-1*-1	N/A	11.02	6.63	11.28	N/A
Hs-miR-30c-2	N/A	12.49	4.71	10.85	N/A
Hs-miR-30c-2*-1	N/A	10.54	6.48	9.69	N/A
Hs-miR-30d*-1	N/A	14.81	N/A	14.31	N/A
Hs-miR-30d-2	N/A	8.57	-0.06	7.55	N/A
Hs-miR-30e*-1	1.70	10.29	4.12	9.31	1.16
Hs-miR-30e-1	N/A	10.02	1.08	9.00	N/A
Hs-miR-31*-1	N/A	N/A	N/A	N/A	N/A
Hs-miR-31-1	N/A	12.93	N/A	14.13	N/A
Hs-miR-32-1	N/A	N/A	N/A	N/A	N/A
Hs-miR-33-1	N/A	N/A	N/A	N/A	N/A
Hs-miR-33a*-1	N/A	15.35	N/A	N/A	N/A
Hs-miR-33b*-1	N/A	9.17	1.85	7.98	-4.60
Hs-miR-33b-3	N/A	N/A	N/A	N/A	N/A
Hs-miR-34a*-1	N/A	13.59	N/A	11.89	N/A
Hs-miR-34a-1	N/A	7.69	0.91	8.55	N/A
Hs-miR-34b-1	N/A	15.42	N/A	N/A	N/A
Hs-miR-34b-2	N/A	13.73	N/A	11.96	N/A
Hs-miR-34c-1	N/A	14.07	N/A	N/A	N/A
Hs-miR-34c-3p-1	N/A	9.26	4.51	7.89	N/A
Hs-miR-92-1	N/A	2.97	-5.15	-2.77	-3.25
Hs-miR-92a-1*-1	N/A	12.83	N/A	12.20	N/A
Hs-miR-92a-2*-1	N/A	12.37	3.30	13.34	N/A
Hs-miR-92b*-2	N/A	8.09	2.87	6.96	N/A
Hs-miR-92b-1	N/A	6.66	0.17	2.40	-2.41
Hs-miR-93*-1	N/A	10.83	4.74	8.51	N/A
Hs-miR-93-1	N/A	8.02	-1.04	5.18	N/A
Hs-miR-95-2	N/A	12.23	7.06	11.05	N/A
Hs-miR-96*-1	N/A	N/A	N/A	N/A	N/A
Hs-miR-96-1	N/A	N/A	N/A	N/A	N/A
Hs-miR-98-1	N/A	11.59	4.07	11.42	N/A
Hs-miR-99a*-1	N/A	10.23	N/A	9.16	N/A
Hs-miR-99a-1	N/A	12.38	5.19	11.36	N/A
Hs-miR-99b*-1	1.52	7.79	2.59	6.63	1.68
Hs-miR-99b-1	N/A	8.15	1.74	8.22	-3.97
Hs-miR-100*-1	N/A	N/A	N/A	N/A	N/A
Hs-miR-100-1	N/A	13.22	6.05	11.49	N/A
Hs-miR-101*-1	N/A	N/A	N/A	N/A	N/A
Hs-miR-101-3	N/A	16.53	6.61	15.81	N/A
Hs-miR-103-1	N/A	6.53	-2.95	5.17	2.30
Hs-miR-103-2*-1	N/A	N/A	N/A	N/A	N/A
Hs-miR-103-as-1	N/A	11.62	5.52	4.59	N/A
Hs-miR-105*-1	N/A	10.76	N/A	9.27	N/A
Hs-miR-105-1	N/A	12.68	8.10	11.69	N/A
Hs-miR-106a*-1	N/A	N/A	N/A	N/A	N/A
Hs-miR-106a-1	N/A	9.90	-0.18	7.84	N/A
Hs-miR-106b*-1	4.15	10.02	5.13	8.95	4.12
Hs-miR-106b-1	N/A	10.18	0.11	8.16	2.01
Hs-miR-122*-1	N/A	13.79	N/A	12.18	N/A
Hs-miR-122a-1	N/A	15.92	9.30	15.49	N/A
Hs-miR-124*-1	N/A	11.19	5.79	10.39	N/A
Hs-miR-124a-1	N/A	10.16	2.01	10.71	-3.56
Hs-miR-125a-1	N/A	9.70	1.69	10.32	N/A
Hs-miR-125a-3p-1	N/A	10.89	7.10	9.87	N/A
Hs-miR-125b-1	N/A	14.32	6.92	11.55	N/A
Hs-miR-125b-1*-1	N/A	14.37	N/A	13.02	N/A
Hs-miR-125b-2*-1	N/A	14.00	N/A	13.00	N/A
Hs-miR-126*-1	N/A	9.19	2.41	8.52	N/A
Hs-miR-126-1	N/A	8.50	-1.56	9.09	3.06
Hs-miR-127-1	N/A	11.46	3.59	11.03	2.80
Hs-miR-127-5p-1	N/A	13.08	N/A	12.85	N/A
Hs-miR-128-1	N/A	12.37	4.94	11.53	N/A
Hs-miR-129*-1	N/A	12.85	3.75	12.10	-0.39
Hs-miR-129-1	N/A	10.13	7.39	10.05	N/A
Hs-miR-129-3p-1	N/A	13.40	4.93	12.56	-1.23
Hs-miR-130a*-1	N/A	13.51	N/A	11.41	N/A
Hs-miR-130a-1	N/A	10.21	0.96	8.84	N/A
Hs-miR-130b*-1	N/A	12.05	6.33	10.98	N/A
Hs-miR-130b-1	N/A	10.07	2.08	8.67	N/A
Hs-miR-132*-1	N/A	N/A	N/A	N/A	N/A
Hs-miR-132-1	N/A	11.35	7.43	10.30	N/A
Hs-miR-133a-1	N/A	11.99	4.35	11.85	1.77
Hs-miR-134-1	N/A	14.42	7.64	14.73	N/A
Hs-miR-135a*-1	5.97	7.41	3.97	5.77	5.52
Hs-miR-135a-2	N/A	N/A	N/A	N/A	N/A
Hs-miR-135b*-1	N/A	N/A	N/A	N/A	N/A
Hs-miR-135b-1	N/A	N/A	N/A	N/A	N/A
Hs-miR-136*-1	N/A	N/A	N/A	N/A	N/A
Hs-miR-136-1	N/A	17.47	N/A	N/A	N/A
Hs-miR-137-1	N/A	N/A	N/A	N/A	N/A
Hs-miR-138-1	N/A	16.59	8.36	16.77	N/A
Hs-miR-138-1*-1	N/A	8.87	4.14	7.69	N/A
Hs-miR-138-2*-1	N/A	7.41	5.01	6.40	N/A
Hs-miR-139-1	N/A	12.75	4.89	14.15	N/A
Hs-miR-139-3p-1	N/A	10.30	6.15	9.45	N/A
Hs-miR-140-1	N/A	N/A	8.91	N/A	N/A
Hs-miR-140-3p-1	N/A	11.94	5.84	9.23	N/A
Hs-miR-141*-1	N/A	14.05	N/A	13.04	N/A
Hs-miR-141-1	N/A	17.47	N/A	16.14	N/A
Hs-miR-142-3p-1	N/A	15.81	2.98	N/A	N/A
Hs-miR-142-5p-1	N/A	15.33	7.54	15.62	N/A
Hs-miR-143*-1	N/A	14.11	N/A	13.02	N/A
Hs-miR-143-1	N/A	15.39	6.71	15.97	N/A
Hs-miR-144*-1	N/A	N/A	N/A	9.14	N/A
Hs-miR-145*-1	N/A	N/A	N/A	N/A	N/A
Hs-miR-145-1	N/A	10.60	2.27	9.51	1.34
Hs-miR-146a*-1	N/A	N/A	N/A	N/A	N/A
Hs-miR-146a-1	N/A	9.70	1.26	13.31	N/A
Hs-miR-146b-1	N/A	10.56	4.80	13.92	N/A
Hs-miR-146b-3p-1	N/A	13.39	N/A	13.24	3.77
Hs-miR-147-1	N/A	13.67	N/A	12.52	0.98
Hs-miR-147b-1	N/A	14.24	N/A	14.89	N/A
Hs-miR-148a*-1	-1.00	8.50	2.04	7.26	-0.55
Hs-miR-148a-1	N/A	13.78	5.83	13.70	N/A
Hs-miR-148b*-1	N/A	14.25	N/A	13.08	N/A
Hs-miR-148b-1	N/A	11.51	2.89	13.32	N/A
Hs-miR-149*-2	N/A	5.57	2.00	4.38	N/A
Hs-miR-149-1	N/A	14.48	N/A	14.47	N/A
Hs-miR-150*-1	N/A	6.83	4.65	5.48	N/A
Hs-miR-150-1	N/A	3.36	2.71	4.51	2.96
Hs-miR-151-3p-1	N/A	11.35	3.98	11.52	N/A
Hs-miR-151-5p-1	N/A	8.19	0.02	7.20	N/A
Hs-miR-152-1	N/A	14.76	6.51	16.41	N/A
Hs-miR-153-1	N/A	N/A	N/A	N/A	N/A
Hs-miR-154*-1	6.19	14.82	N/A	13.59	N/A
Hs-miR-154-1	N/A	13.46	6.77	13.62	N/A
Hs-miR-155*-1	N/A	13.54	6.19	N/A	N/A
Hs-miR-155-1	N/A	N/A	N/A	N/A	N/A
Hs-miR-181a*-1	1.11	9.04	2.57	8.45	2.58
Hs-miR-181a-2	N/A	9.35	2.04	10.64	N/A
Hs-miR-181a-2*-1	N/A	13.94	6.85	13.33	N/A
Hs-miR-181b-1	N/A	10.58	4.36	11.08	N/A
Hs-miR-181c*-1	N/A	11.95	5.88	10.20	N/A
Hs-miR-181c-2	N/A	10.70	3.40	12.26	N/A
Hs-miR-181d-1	N/A	10.06	4.21	10.36	0.86
Hs-miR-182*-2	N/A	14.96	N/A	N/A	N/A
Hs-miR-182-2	N/A	12.50	6.12	8.10	2.55
Hs-miR-183*-1	N/A	14.09	N/A	10.95	N/A
Hs-miR-183-1	N/A	11.11	8.68	8.24	N/A
Hs-miR-184-1	N/A	16.97	N/A	16.84	N/A
Hs-miR-185*-1	N/A	14.38	N/A	13.50	N/A
Hs-miR-185-1	N/A	9.94	1.31	5.73	N/A
Hs-miR-186*-1	N/A	13.93	6.35	13.13	N/A
Hs-miR-186-1	N/A	N/A	N/A	N/A	N/A
Hs-miR-187*-1	N/A	8.86	4.95	6.93	N/A
Hs-miR-187-1	N/A	9.96	6.01	10.11	2.06
Hs-miR-188-1	N/A	9.47	6.15	8.22	N/A
Hs-miR-188-3p-1	N/A	7.93	3.00	7.15	N/A
Hs-miR-190-2	N/A	N/A	N/A	N/A	N/A
Hs-miR-190b-1	N/A	N/A	N/A	N/A	N/A
Hs-miR-191*-1	N/A	12.99	5.73	12.35	N/A
Hs-miR-191-1	N/A	5.94	-1.78	2.58	2.14
Hs-miR-192*-1	N/A	N/A	N/A	N/A	N/A
Hs-miR-192-1	N/A	12.74	5.74	10.53	1.53
Hs-miR-193a-1	N/A	13.05	7.09	12.05	1.53
Hs-miR-193a-5p-1	N/A	12.10	N/A	11.09	N/A
Hs-miR-193b*-1	N/A	12.18	5.89	11.31	N/A
Hs-miR-193b-2	N/A	9.98	4.94	8.99	N/A
Hs-miR-194*-1	N/A	10.25	5.79	9.77	N/A
Hs-miR-194-1	N/A	16.40	9.08	13.81	N/A
Hs-miR-195*-1	N/A	10.43	5.08	8.59	N/A
Hs-miR-195-1	N/A	5.90	-3.35	1.99	0.04
Hs-miR-196a*-1	N/A	12.34	6.28	11.34	N/A
Hs-miR-196a-1	N/A	12.80	7.34	12.50	N/A
Hs-miR-196b*-1	N/A	11.45	6.87	10.87	N/A
Hs-miR-196b-1	N/A	14.14	7.85	13.87	N/A
Hs-miR-197-2	N/A	7.22	0.87	5.90	-0.24
Hs-miR-198-2	N/A	12.22	4.97	10.51	N/A
Hs-miR-199a-1	N/A	10.67	2.07	13.38	N/A
Hs-miR-199a-3p-1	N/A	10.74	1.46	15.54	N/A
Hs-miR-199b-1	N/A	13.62	6.17	13.52	N/A
Hs-miR-200a*-2	N/A	11.15	6.36	9.91	N/A
Hs-miR-200a-1	N/A	N/A	N/A	N/A	N/A
Hs-miR-200b*-1	N/A	12.00	N/A	11.52	N/A
Hs-miR-200b-3	N/A	15.01	N/A	N/A	N/A
Hs-miR-200c*-1	N/A	14.81	N/A	14.24	N/A
Hs-miR-200c-1	N/A	13.16	7.63	13.49	N/A
Hs-miR-202*-2	N/A	N/A	N/A	N/A	N/A
Hs-miR-202-2	N/A	8.61	4.52	7.41	N/A
Hs-miR-203-1	N/A	16.54	N/A	15.97	N/A
Hs-miR-204-1	N/A	N/A	N/A	N/A	N/A
Hs-miR-205*-1	N/A	N/A	N/A	N/A	N/A
Hs-miR-205-1	N/A	14.30	9.38	12.92	N/A
Hs-miR-206-1	N/A	16.06	N/A	16.22	N/A
Hs-miR-208-1	N/A	N/A	N/A	17.10	N/A
Hs-miR-208b-1	N/A	N/A	N/A	N/A	N/A
Hs-miR-210-1	N/A	10.04	3.07	9.53	N/A
Hs-miR-211-1	N/A	13.05	N/A	11.89	N/A
Hs-miR-212-1	N/A	14.96	N/A	14.34	N/A
Hs-miR-214*-1	N/A	N/A	N/A	N/A	N/A
Hs-miR-214-1	N/A	7.14	0.43	6.11	3.30
Hs-miR-215-1	N/A	13.72	N/A	N/A	N/A
Hs-miR-216a-1	N/A	13.65	N/A	12.89	N/A
Hs-miR-216b-1	N/A	11.99	N/A	12.12	N/A
Hs-miR-217-1	N/A	N/A	N/A	N/A	N/A
Hs-miR-218-1	N/A	N/A	N/A	N/A	N/A
Hs-miR-218-1*-1	N/A	13.53	N/A	12.74	N/A
Hs-miR-218-2*-1	N/A	11.37	6.27	10.61	N/A
Hs-miR-219-1	N/A	N/A	N/A	N/A	N/A
Hs-miR-219-1-3p-1	N/A	11.42	4.90	12.18	N/A
Hs-miR-219-2-3p-1	N/A	11.59	N/A	11.78	N/A
Hs-miR-220-1	N/A	13.35	N/A	12.35	N/A
Hs-miR-220b-1	N/A	14.21	N/A	13.18	N/A
Hs-miR-220c-1	N/A	12.53	N/A	12.09	N/A
Hs-miR-221*-1	N/A	15.31	N/A	N/A	N/A
Hs-miR-221-1	N/A	6.13	-2.78	6.28	N/A
Hs-miR-222*-1	N/A	14.34	N/A	13.32	N/A
Hs-miR-222-2	N/A	6.49	-1.08	6.55	N/A
Hs-miR-223*-1	N/A	13.10	7.82	12.53	N/A
Hs-miR-223-1	N/A	7.43	-1.86	7.42	N/A
Hs-miR-224*-1	N/A	14.52	7.31	13.55	N/A
Hs-miR-224-1	N/A	12.04	4.94	12.50	-0.44
Hs-miR-296-3p-1	N/A	11.04	N/A	9.77	N/A
Hs-miR-296-5p-1	N/A	10.96	5.33	7.61	N/A
Hs-miR-297-1	N/A	12.98	N/A	12.29	N/A
Hs-miR-298-1	N/A	11.35	N/A	9.71	N/A
Hs-miR-299-3p-1	N/A	6.91	2.20	5.48	N/A
Hs-miR-299-5p-1	N/A	14.64	6.83	N/A	N/A
Hs-miR-300-1	N/A	11.49	N/A	10.33	N/A
Hs-miR-301a-1	N/A	11.91	4.84	11.95	N/A
Hs-miR-301b-1	N/A	11.32	5.93	11.79	N/A
Hs-miR-302a*-3	N/A	13.24	N/A	12.46	N/A
Hs-miR-302a-2	N/A	13.29	6.03	12.78	N/A
Hs-miR-302b*-2	N/A	N/A	N/A	N/A	N/A
Hs-miR-302b-1	N/A	15.28	N/A	15.02	N/A
Hs-miR-302c*-1	N/A	10.62	N/A	9.88	N/A
Hs-miR-302c-1	N/A	14.48	N/A	14.19	N/A
Hs-miR-302d*-1	N/A	13.29	N/A	12.18	N/A
Hs-miR-302d-1	N/A	12.38	8.02	12.40	N/A
Hs-miR-302e-1	N/A	14.79	N/A	N/A	N/A
Hs-miR-302f-1	N/A	N/A	N/A	N/A	N/A
Hs-miR-320a-1	N/A	2.85	-4.41	0.57	N/A
Hs-miR-320b-1	N/A	4.51	-3.49	1.95	-0.62
Hs-miR-320c-1	N/A	2.88	-4.23	0.41	N/A
Hs-miR-320d-1	N/A	2.68	-4.63	0.28	0.56
Hs-miR-323-3p-1	N/A	5.22	-3.09	4.01	-8.15
Hs-miR-323-5p-2	N/A	2.82	-1.43	0.17	-0.49
Hs-miR-324-3p-2	N/A	6.69	-0.14	3.73	N/A
Hs-miR-324-5p-1	N/A	11.96	3.66	10.61	N/A
Hs-miR-325-1	N/A	N/A	N/A	N/A	N/A
Hs-miR-326-1	N/A	7.90	1.42	8.10	0.15
Hs-miR-328-1	N/A	5.64	-2.46	3.52	-0.54
Hs-miR-329-1	N/A	12.79	5.58	12.94	N/A
Hs-miR-330-3p-1	N/A	9.31	3.86	8.74	N/A
Hs-miR-330-5p-1	N/A	12.93	7.09	13.26	N/A
Hs-miR-331-1	N/A	11.00	3.23	9.52	N/A
Hs-miR-331-5p-1	N/A	10.10	6.24	9.94	N/A
Hs-miR-335*-1	N/A	12.99	N/A	11.79	N/A
Hs-miR-335-1	N/A	12.90	5.23	12.12	-0.27
Hs-miR-337-3p-1	N/A	15.06	N/A	N/A	N/A
Hs-miR-337-5p-1	N/A	13.91	5.79	12.56	N/A
Hs-miR-338-1	N/A	14.64	5.74	N/A	N/A
Hs-miR-338-5p-1	N/A	11.10	5.61	10.10	N/A
Hs-miR-339-1	N/A	9.56	2.37	9.79	N/A
Hs-miR-339-3p-1	N/A	9.22	3.59	8.38	N/A
Hs-miR-340-1	N/A	14.01	6.89	13.32	N/A
Hs-miR-340-2	N/A	N/A	N/A	N/A	N/A
Hs-miR-342-1	N/A	4.92	-0.27	5.60	N/A
Hs-miR-342-5p-1	N/A	7.57	4.53	7.61	N/A
Hs-miR-345-2	N/A	8.53	3.75	7.59	N/A
Hs-miR-346-2	N/A	9.42	5.49	9.07	N/A
Hs-miR-361-1	N/A	11.96	4.41	11.68	N/A
Hs-miR-361-3p-1	N/A	14.03	7.10	12.80	N/A
Hs-miR-362-3p-1	N/A	N/A	6.94	N/A	N/A
Hs-miR-362-5p-1	N/A	13.60	N/A	12.44	N/A
Hs-miR-363*-1	N/A	15.16	N/A	N/A	N/A
Hs-miR-363-1	N/A	9.50	3.98	6.24	N/A
Hs-miR-365*-1	N/A	7.62	4.73	7.01	N/A
Hs-miR-365-1	N/A	14.39	N/A	12.89	N/A
Hs-miR-367*-1	N/A	N/A	N/A	N/A	N/A
Hs-miR-367-2	N/A	N/A	N/A	N/A	N/A
Hs-miR-368-1	N/A	11.52	5.65	N/A	N/A
Hs-miR-369-3p-1	N/A	N/A	N/A	N/A	N/A
Hs-miR-369-5p-1	N/A	13.00	N/A	N/A	N/A
Hs-miR-370-1	N/A	9.07	3.47	8.00	N/A
Hs-miR-371-1	N/A	12.97	N/A	12.27	N/A
Hs-miR-371-5p-1	N/A	12.40	N/A	11.39	N/A
Hs-miR-372-1	N/A	13.62	N/A	12.93	N/A
Hs-miR-373*-1	N/A	10.11	N/A	9.48	N/A
Hs-miR-373-1	N/A	9.58	3.01	7.90	0.15
Hs-miR-374a*-1	N/A	N/A	N/A	N/A	N/A
Hs-miR-374a-1	N/A	N/A	-13.58	N/A	N/A
Hs-miR-374b*-1	N/A	N/A	N/A	N/A	N/A
Hs-miR-374b-1	N/A	13.31	5.37	12.64	N/A
Hs-miR-375-1	N/A	8.68	0.64	6.73	-4.11
Hs-miR-376a*-3	N/A	N/A	N/A	N/A	N/A
Hs-miR-376a-1	N/A	N/A	N/A	N/A	N/A
Hs-miR-376b-1	N/A	N/A	N/A	N/A	N/A
Hs-miR-377*-1	N/A	14.51	N/A	12.29	N/A
Hs-miR-377-1	N/A	N/A	6.93	N/A	N/A
Hs-miR-378-1	6.02	11.32	6.65	9.85	5.70
Hs-miR-379*-1	N/A	N/A	N/A	N/A	N/A
Hs-miR-379-2	N/A	13.03	8.08	13.05	N/A
Hs-miR-380-3p-1	N/A	N/A	N/A	N/A	N/A
Hs-miR-380-5p-1	-1.83	6.22	-0.09	5.26	-1.78
Hs-miR-381-1	N/A	11.58	6.51	11.53	N/A
Hs-miR-382-1	N/A	11.29	4.57	11.58	N/A
Hs-miR-383-1	N/A	N/A	N/A	N/A	N/A
Hs-miR-384-2	N/A	N/A	N/A	N/A	N/A
Hs-miR-409-3p-1	N/A	12.35	4.68	12.60	N/A
Hs-miR-409-5p-1	N/A	13.39	7.44	13.66	N/A
Hs-miR-410-1	N/A	13.56	7.78	12.78	N/A
Hs-miR-411*-1	N/A	N/A	N/A	N/A	N/A
Hs-miR-411-1	N/A	N/A	N/A	N/A	N/A
Hs-miR-412-1	N/A	11.77	6.15	10.48	N/A
Hs-miR-421-1	N/A	8.77	5.09	7.30	N/A
Hs-miR-422a-1	N/A	12.42	N/A	11.58	N/A
Hs-miR-422b-1	N/A	10.78	5.77	9.39	N/A
Hs-miR-423-1	N/A	7.04	-0.93	5.80	-3.16
Hs-miR-423-5p-1	N/A	9.00	N/A	6.95	N/A
Hs-miR-424*-1	N/A	10.15	N/A	9.21	N/A
Hs-miR-424-1	N/A	13.28	4.59	12.16	N/A
Hs-miR-425-1	N/A	8.82	1.31	5.49	N/A
Hs-miR-425-3p-1	N/A	9.77	3.78	8.45	1.20
Hs-miR-429-1	N/A	N/A	N/A	N/A	N/A
Hs-miR-431*-1	N/A	13.01	5.77	12.31	N/A
Hs-miR-431-1	N/A	10.35	4.00	10.36	N/A
Hs-miR-432*-1	N/A	11.91	N/A	11.88	N/A
Hs-miR-432-1	N/A	10.26	4.00	10.92	N/A
Hs-miR-433-1	N/A	11.10	4.24	10.16	0.06
Hs-miR-448-1	N/A	14.41	N/A	13.14	N/A
Hs-miR-449-1	N/A	10.65	5.22	10.80	N/A
Hs-miR-449b*-1	N/A	8.48	3.25	7.74	N/A
Hs-miR-449b-1	N/A	12.53	7.22	11.58	N/A
Hs-miR-450-1	N/A	N/A	N/A	N/A	N/A
Hs-miR-450b-3p-1	N/A	N/A	N/A	N/A	N/A
Hs-miR-450b-5p-1	N/A	N/A	N/A	N/A	N/A
Hs-miR-451-1	N/A	11.69	0.32	-0.04	-1.26
Hs-miR-452*-2	N/A	15.55	N/A	N/A	N/A
Hs-miR-452-3	N/A	14.88	N/A	N/A	N/A
Hs-miR-453-3	N/A	10.17	4.08	9.89	N/A
Hs-miR-454-1	N/A	N/A	N/A	N/A	N/A
Hs-miR-454-5p-1	N/A	14.20	N/A	12.90	N/A
Hs-miR-455-1	N/A	N/A	N/A	N/A	N/A
Hs-miR-455-3p-1	N/A	14.59	N/A	12.92	N/A
Hs-miR-483-3p-2	N/A	13.32	-9.15	11.46	N/A
Hs-miR-483-5p-1	N/A	5.55	3.02	6.78	-1.56
Hs-miR-484-1	N/A	6.48	-0.95	2.16	-1.89
Hs-miR-485-3p-1	N/A	11.29	5.88	11.98	N/A
Hs-miR-485-5p-1	N/A	12.35	5.49	12.89	N/A
Hs-miR-486-1	N/A	6.52	-1.79	-3.23	-2.43
Hs-miR-486-3p-1	N/A	12.05	5.80	12.59	N/A
Hs-miR-487a-1	N/A	12.20	4.96	12.33	N/A
Hs-miR-487b-1	N/A	11.81	3.93	12.46	N/A
Hs-miR-488-1	N/A	14.49	N/A	13.98	N/A
Hs-miR-488-3	N/A	N/A	N/A	N/A	N/A
Hs-miR-489-2	N/A	5.88	2.37	4.11	N/A
Hs-miR-490-1	N/A	12.88	5.50	12.64	N/A
Hs-miR-490-5p-1	N/A	9.49	4.00	7.77	N/A
Hs-miR-491-1	N/A	13.90	5.52	13.68	N/A
Hs-miR-491-3p-1	N/A	N/A	N/A	N/A	N/A
Hs-miR-492-1	N/A	14.28	N/A	14.20	N/A
Hs-miR-493*-1	N/A	15.45	N/A	N/A	N/A
Hs-miR-493-3p-1	N/A	11.58	5.67	11.45	N/A
Hs-miR-494-1	N/A	2.86	-2.55	1.69	-0.76
Hs-miR-495-1	N/A	13.96	5.16	N/A	N/A
Hs-miR-496-2	N/A	14.60	7.22	14.61	N/A
Hs-miR-497*-1	N/A	N/A	N/A	N/A	N/A
Hs-miR-497-1	N/A	13.62	5.53	11.35	N/A
Hs-miR-498-1	N/A	N/A	N/A	N/A	N/A
Hs-miR-499-1	N/A	N/A	N/A	N/A	N/A
Hs-miR-499-3p-1	N/A	N/A	N/A	N/A	N/A
Hs-miR-500-1	N/A	11.61	N/A	10.04	N/A
Hs-miR-500-2	N/A	8.43	1.21	6.23	N/A
Hs-miR-501-3p-1	N/A	5.61	-0.05	4.58	N/A
Hs-miR-501-5p-1	N/A	6.54	0.66	4.94	N/A
Hs-miR-502-1	N/A	7.53	-0.31	5.61	N/A
Hs-miR-502-3p-1	N/A	6.92	0.06	4.83	N/A
Hs-miR-503-1	N/A	5.05	-3.13	3.88	N/A
Hs-miR-504-1	N/A	13.93	N/A	13.66	N/A
Hs-miR-505*-1	N/A	12.93	4.42	10.59	N/A
Hs-miR-505-1	N/A	13.44	6.30	13.56	N/A
Hs-miR-506-2	N/A	8.48	0.12	6.33	N/A
Hs-miR-507-1	N/A	N/A	N/A	N/A	N/A
Hs-miR-508-3p-1	N/A	10.12	1.13	9.08	N/A
Hs-miR-508-5p-1	N/A	9.68	N/A	8.68	N/A
Hs-miR-509-3-5p-1	N/A	11.18	N/A	N/A	N/A
Hs-miR-509-3p-1	N/A	7.52	0.83	6.23	N/A
Hs-miR-509-5p-1	N/A	11.27	N/A	N/A	N/A
Hs-miR-510-2	N/A	9.03	-0.93	8.17	N/A
Hs-miR-511-1	N/A	N/A	N/A	N/A	N/A
Hs-miR-512-3p-1	N/A	8.64	2.10	7.66	N/A
Hs-miR-512-5p-1	N/A	9.90	N/A	9.08	N/A
Hs-miR-513-5p-1	N/A	9.43	N/A	7.56	N/A
Hs-miR-513a-3p-1	N/A	N/A	N/A	N/A	N/A
Hs-miR-513b-1	N/A	N/A	N/A	N/A	N/A
Hs-miR-513c-1	N/A	N/A	-0.27	N/A	N/A
Hs-miR-514-1	N/A	N/A	2.48	N/A	N/A
Hs-miR-515-3p-1	N/A	9.23	0.84	8.17	N/A
Hs-miR-515-5p-1	N/A	N/A	N/A	N/A	N/A
Hs-miR-516a-3p-1	N/A	11.09	-0.23	N/A	N/A
Hs-miR-516a-5p-1	N/A	N/A	N/A	N/A	N/A
Hs-miR-516b-1	N/A	10.61	N/A	9.31	N/A
Hs-miR-517*-1	N/A	13.74	N/A	13.79	N/A
Hs-miR-517a-1	N/A	9.40	0.51	8.43	N/A
Hs-miR-517b-1	N/A	9.84	2.83	8.26	N/A
Hs-miR-517c-1	N/A	8.68	0.50	7.45	N/A
Hs-miR-518a-1	N/A	9.20	2.84	7.77	N/A
Hs-miR-518a-5p-1	N/A	N/A	N/A	N/A	N/A
Hs-miR-518b-1	N/A	11.24	N/A	N/A	N/A
Hs-miR-518c*-1	N/A	12.81	N/A	12.88	N/A
Hs-miR-518c-1	N/A	11.07	1.70	N/A	N/A
Hs-miR-518d-3p-1	N/A	11.04	N/A	9.90	N/A
Hs-miR-518d-5p-1	N/A	9.32	N/A	8.76	N/A
Hs-miR-518e*-1	N/A	8.38	-0.02	8.12	N/A
Hs-miR-518e-1	N/A	10.96	-0.10	N/A	N/A
Hs-miR-518f*-2	N/A	12.61	N/A	12.09	N/A
Hs-miR-518f-2	N/A	N/A	0.06	N/A	N/A
Hs-miR-519a-2	N/A	9.91	2.02	9.18	N/A
Hs-miR-519b-1	N/A	N/A	1.76	N/A	N/A
Hs-miR-519c-3p-1	N/A	N/A	N/A	N/A	N/A
Hs-miR-519d-1	N/A	N/A	N/A	N/A	N/A
Hs-miR-519e*-1	N/A	N/A	N/A	N/A	N/A
Hs-miR-519e-3	N/A	10.60	-0.83	9.27	N/A
Hs-miR-520a*-1	N/A	N/A	2.00	N/A	N/A
Hs-miR-520a-1	N/A	10.51	-0.04	10.04	N/A
Hs-miR-520b-1	N/A	10.40	N/A	9.04	N/A
Hs-miR-520c-1	N/A	9.34	0.92	8.15	N/A
Hs-miR-520d-1	N/A	5.75	-0.98	4.53	N/A
Hs-miR-520d-5p-1	N/A	N/A	N/A	N/A	N/A
Hs-miR-520e-1	N/A	N/A	N/A	N/A	N/A
Hs-miR-520g-1	N/A	N/A	N/A	N/A	N/A
Hs-miR-521-1	N/A	N/A	N/A	N/A	N/A
Hs-miR-522-2	N/A	N/A	2.12	N/A	N/A
Hs-miR-523-1	N/A	N/A	N/A	N/A	N/A
Hs-miR-524*-1	N/A	10.67	N/A	9.95	N/A
Hs-miR-524-1	N/A	10.19	N/A	9.34	N/A
Hs-miR-525*-1	N/A	10.65	1.93	N/A	N/A
Hs-miR-525-1	N/A	N/A	N/A	N/A	N/A
Hs-miR-526b-1	N/A	10.71	N/A	9.90	N/A
Hs-miR-532-1	N/A	9.99	4.98	8.43	N/A
Hs-miR-532-3p-1	N/A	10.87	4.78	6.97	0.54
Hs-miR-539-1	N/A	13.37	N/A	13.99	N/A
Hs-miR-541*-1	N/A	11.95	4.08	11.30	N/A
Hs-miR-541-1	N/A	10.03	0.17	6.61	N/A
Hs-miR-542-3p-2	N/A	13.46	N/A	12.42	N/A
Hs-miR-542-5p-1	N/A	14.36	N/A	13.85	N/A
Hs-miR-543-1	N/A	12.12	4.98	12.62	N/A
Hs-miR-544-2	N/A	N/A	N/A	N/A	N/A
Hs-miR-545*-1	N/A	N/A	N/A	N/A	N/A
Hs-miR-545-3	N/A	N/A	N/A	N/A	N/A
Hs-miR-548a-1	N/A	N/A	-2.80	N/A	N/A
Hs-miR-548a-5p-1	N/A	10.84	N/A	N/A	N/A
Hs-miR-548b-1	N/A	N/A	N/A	N/A	N/A
Hs-miR-548b-5p-1	N/A	8.97	N/A	8.04	N/A
Hs-miR-548c-3p-1	N/A	N/A	N/A	N/A	N/A
Hs-miR-548c-5p-1	N/A	8.83	0.89	7.09	N/A
Hs-miR-548d-1	N/A	N/A	N/A	N/A	N/A
Hs-miR-548d-5p-1	N/A	9.90	1.20	8.86	N/A
Hs-miR-548e-1	N/A	N/A	N/A	N/A	N/A
Hs-miR-548f-1	N/A	N/A	N/A	N/A	N/A
Hs-miR-548g-1	N/A	N/A	N/A	N/A	N/A
Hs-miR-548h-1	N/A	N/A	N/A	N/A	N/A
Hs-miR-548i-1	N/A	10.17	0.50	7.21	N/A
Hs-miR-548j-1	N/A	7.70	-0.77	6.51	N/A
Hs-miR-548k-1	N/A	N/A	-0.53	N/A	N/A
Hs-miR-548l-1	N/A	8.96	-0.72	8.50	N/A
Hs-miR-548m-1	N/A	N/A	N/A	N/A	N/A
Hs-miR-548n-1	N/A	N/A	N/A	N/A	N/A
Hs-miR-548o-1	N/A	N/A	N/A	N/A	N/A
Hs-miR-548p-1	N/A	N/A	N/A	N/A	N/A
Hs-miR-549-1	N/A	N/A	N/A	N/A	N/A
Hs-miR-550-1	N/A	12.88	N/A	11.64	N/A
Hs-miR-550-2	N/A	6.07	-1.24	4.89	N/A
Hs-miR-551a-2	N/A	11.52	-0.47	N/A	N/A
Hs-miR-551b*-1	N/A	7.03	4.03	5.58	N/A
Hs-miR-551b-1	N/A	15.60	8.66	N/A	N/A
Hs-miR-552-2	N/A	8.61	1.60	6.49	N/A
Hs-miR-553-2	N/A	11.46	N/A	N/A	N/A
Hs-miR-554-1	2.89	10.70	4.53	9.79	2.26
Hs-miR-555-1	1.91	10.44	3.46	8.98	1.92
Hs-miR-556-3p-1	N/A	N/A	N/A	N/A	N/A
Hs-miR-556-5p-1	4.21	N/A	6.38	N/A	N/A
Hs-miR-557-1	N/A	8.23	4.02	7.33	4.51
Hs-miR-558-1	2.59	8.91	1.66	8.19	3.35
Hs-miR-559-2	3.45	13.12	5.54	12.04	3.72
Hs-miR-561-2	3.81	N/A	N/A	N/A	3.69
Hs-miR-562-1	2.20	11.12	4.61	10.00	1.74
Hs-miR-563-1	1.09	11.51	3.31	10.65	1.36
Hs-miR-564-1	1.62	6.73	1.37	5.62	1.89
Hs-miR-566-1	-2.91	5.84	-0.09	4.17	-2.91
Hs-miR-567-1	N/A	14.60	6.50	N/A	N/A
Hs-miR-569-2	N/A	N/A	7.65	N/A	N/A
Hs-miR-570-2	N/A	N/A	8.35	N/A	N/A
Hs-miR-571-1	1.36	9.09	3.34	6.12	1.99
Hs-miR-573-1	2.36	9.95	4.55	8.64	0.90
Hs-miR-574-1	N/A	6.73	0.32	6.54	0.64
Hs-miR-575-1	1.84	6.76	1.32	5.41	2.09
Hs-miR-576-3p-1	N/A	N/A	5.49	N/A	N/A
Hs-miR-576-5p-1	N/A	N/A	N/A	N/A	N/A
Hs-miR-577-1	N/A	14.28	6.02	N/A	N/A
Hs-miR-578-1	1.27	12.27	3.02	11.26	2.24
Hs-miR-579-2	N/A	N/A	N/A	N/A	N/A
Hs-miR-580-2	N/A	N/A	N/A	N/A	N/A
Hs-miR-581-1	3.46	N/A	6.23	N/A	4.70
Hs-miR-582-1	N/A	N/A	N/A	N/A	N/A
Hs-miR-582-3p-1	N/A	13.53	5.53	12.94	4.20
Hs-miR-583-1	N/A	13.55	6.60	12.37	N/A
Hs-miR-584-1	2.05	7.14	2.21	5.59	2.46
Hs-miR-585-2	4.04	13.38	5.58	12.36	4.18
Hs-miR-586-2	N/A	13.91	6.03	12.78	3.79
Hs-miR-587-1	N/A	N/A	N/A	N/A	N/A
Hs-miR-588-1	0.48	9.32	3.05	8.11	0.92
Hs-miR-589*-1	N/A	N/A	N/A	13.28	N/A
Hs-miR-589-2	3.69	9.05	3.64	7.76	4.22
Hs-miR-590-1	N/A	15.04	5.81	15.01	N/A
Hs-miR-590-3p-1	N/A	N/A	N/A	N/A	N/A
Hs-miR-591-1	N/A	14.66	N/A	13.89	N/A
Hs-miR-592-1	N/A	10.90	N/A	10.27	N/A
Hs-miR-593-1	N/A	10.77	N/A	10.57	N/A
Hs-miR-593-3	N/A	6.79	3.37	5.53	N/A
Hs-miR-595-1	3.86	8.02	3.72	6.53	3.93
Hs-miR-596-2	2.33	8.33	2.48	6.75	2.35
Hs-miR-597-1	N/A	12.80	7.33	11.92	N/A
Hs-miR-598-2	2.68	11.55	4.30	10.52	2.57
Hs-miR-599-2	N/A	13.19	3.81	13.07	N/A
Hs-miR-600-1	3.27	N/A	6.32	N/A	3.77
Hs-miR-601-1	-2.34	5.49	-0.01	4.43	-1.41
Hs-miR-602-2	N/A	11.90	5.79	10.74	N/A
Hs-miR-603-1	N/A	N/A	6.02	N/A	N/A
Hs-miR-604-1	2.03	7.15	1.90	5.48	2.61
Hs-miR-605-1	1.16	8.89	2.45	6.86	1.76
Hs-miR-606-1	N/A	N/A	N/A	N/A	N/A
Hs-miR-607-1	N/A	14.20	N/A	N/A	N/A
Hs-miR-608-1	3.27	9.12	4.11	8.01	3.88
Hs-miR-609-1	3.54	11.55	6.13	9.33	4.33
Hs-miR-610-2	1.13	6.56	2.04	4.79	1.55
Hs-miR-611-2	N/A	14.47	5.67	12.77	N/A
Hs-miR-612-1	N/A	13.26	6.80	12.02	4.65
Hs-miR-613-1	2.06	11.55	4.57	10.32	2.34
Hs-miR-614-2	1.30	5.76	1.95	3.50	1.69
Hs-miR-615-1	N/A	11.33	6.92	10.67	N/A
Hs-miR-615-5p-1	N/A	13.62	N/A	13.25	N/A
Hs-miR-616-1	N/A	14.65	N/A	N/A	N/A
Hs-miR-616-3	2.86	5.46	1.42	3.50	3.12
Hs-miR-617-1	1.08	7.66	2.23	4.32	1.12
Hs-miR-618-1	N/A	15.10	5.17	N/A	N/A
Hs-miR-619-1	N/A	10.22	4.89	9.24	4.79
Hs-miR-620-2	N/A	N/A	6.20	N/A	N/A
Hs-miR-621-1	N/A	12.38	5.05	12.02	N/A
Hs-miR-622-1	3.51	8.75	3.33	7.56	3.16
Hs-miR-623-1	1.75	7.17	2.67	5.54	3.30
Hs-miR-624*-1	N/A	N/A	N/A	N/A	N/A
Hs-miR-624-2	N/A	N/A	N/A	N/A	N/A
Hs-miR-625*-1	N/A	11.06	0.62	10.08	N/A
Hs-miR-625-2	3.54	8.39	0.09	9.19	4.01
Hs-miR-626-2	N/A	13.86	N/A	13.00	N/A
Hs-miR-627-2	0.45	10.73	3.55	9.46	1.28
Hs-miR-628-1	-2.55	8.38	-0.18	6.83	-2.56
Hs-miR-628-5p-1	1.11	8.61	2.56	7.55	0.79
Hs-miR-629-1	N/A	10.40	4.80	9.13	N/A
Hs-miR-629-2	N/A	11.56	5.80	10.01	N/A
Hs-miR-630-1	0.01	8.50	2.48	7.25	0.79
Hs-miR-631-1	-3.38	6.24	-0.83	5.14	-3.26
Hs-miR-632-2	0.12	7.24	1.85	5.78	0.31
Hs-miR-633-2	N/A	14.25	5.71	13.17	N/A
Hs-miR-634-1	4.47	9.91	2.17	10.00	5.00
Hs-miR-635-1	3.39	12.86	5.97	12.07	3.89
Hs-miR-636-3	-1.78	5.73	0.02	4.17	-1.73
Hs-miR-637-1	-0.63	8.15	1.80	6.95	-0.26
Hs-miR-639-2	N/A	11.58	5.52	10.37	4.43
Hs-miR-640-2	2.97	9.59	3.47	8.21	3.06
Hs-miR-641-1	-5.52	4.94	-2.14	3.78	-4.77
Hs-miR-642-1	1.94	10.29	4.05	9.07	1.96
Hs-miR-643-1	N/A	12.45	6.31	10.95	4.51
Hs-miR-644-1	1.99	10.74	3.92	10.18	2.13
Hs-miR-645-2	4.62	10.91	2.60	10.55	N/A
Hs-miR-646-1	N/A	10.61	5.86	9.60	N/A
Hs-miR-647-1	3.35	10.36	3.75	9.54	3.84
Hs-miR-648-1	N/A	14.76	6.62	13.49	N/A
Hs-miR-649-1	3.93	11.91	5.63	11.25	3.39
Hs-miR-650-1	N/A	9.46	4.53	7.88	N/A
Hs-miR-651-1	N/A	14.51	N/A	12.94	N/A
Hs-miR-652-3	N/A	8.07	-0.68	6.33	N/A
Hs-miR-653-3	N/A	14.11	N/A	13.17	N/A
Hs-miR-654-1	-1.75	7.25	1.49	6.09	-1.12
Hs-miR-654-3p-1	N/A	13.48	7.08	12.09	N/A
Hs-miR-655-2	N/A	N/A	N/A	N/A	N/A
Hs-miR-656-1	3.28	14.11	5.81	13.32	4.97
Hs-miR-657-2	-3.51	9.71	-0.47	8.60	-2.52
Hs-miR-658-1	3.75	8.16	-0.40	7.57	3.64
Hs-miR-659-2	3.65	8.00	3.47	6.03	3.30
Hs-miR-660-1	4.30	10.78	5.55	9.61	3.88
Hs-miR-661-1	-0.64	6.97	0.72	5.79	-0.36
Hs-miR-662-1	4.42	7.73	3.78	6.69	5.89
Hs-miR-664*-1	N/A	12.50	N/A	12.22	N/A
Hs-miR-664-1	5.60	9.29	4.14	8.34	5.51
Hs-miR-665-1	3.25	6.95	2.78	5.58	3.19
Hs-miR-668-1	N/A	11.29	4.23	11.88	N/A
Hs-miR-671-3p-1	N/A	9.66	4.16	9.31	0.13
Hs-miR-671-5p-2	N/A	11.42	8.68	10.45	N/A
Hs-miR-675-1	5.74	9.73	4.01	8.68	5.55
Hs-miR-675b-1	N/A	4.58	2.83	4.43	-0.28
Hs-miR-708*-1	N/A	14.18	N/A	12.97	N/A
Hs-miR-708-1	N/A	10.83	6.11	9.70	0.06
Hs-miR-720-1	0.45	5.78	0.69	3.74	-0.15
Hs-miR-744*-1	N/A	12.99	5.43	13.52	N/A
Hs-miR-744-1	N/A	8.29	0.40	8.89	N/A
Hs-miR-758-2	N/A	15.02	N/A	14.99	N/A
Hs-miR-760-1	N/A	8.75	4.20	8.05	1.31
Hs-miR-766-1	-4.46	4.29	-2.21	3.14	-4.47
Hs-miR-767-3p-1	N/A	12.50	6.08	12.23	N/A
Hs-miR-767-5p-1	N/A	14.44	N/A	14.01	N/A
Hs-miR-769-3p-2	N/A	9.02	5.69	7.49	N/A
Hs-miR-769-5p-1	4.15	10.26	6.04	8.94	5.55
Hs-miR-770-5p-2	1.09	6.85	2.12	5.28	1.28
Hs-miR-802-2	N/A	N/A	N/A	N/A	N/A
Hs-miR-873-1	N/A	N/A	N/A	N/A	N/A
Hs-miR-875-3p-1	-0.13	9.50	2.40	8.19	-0.37
Hs-miR-875-5p-1	N/A	14.72	N/A	N/A	N/A
Hs-miR-876-3p-1	N/A	N/A	N/A	N/A	N/A
Hs-miR-876-5p-1	1.86	10.97	5.15	10.46	1.53
Hs-miR-877*-1	N/A	9.56	2.47	8.78	N/A
Hs-miR-877-1	N/A	9.57	4.88	8.97	N/A
Hs-miR-885-3p-1	6.07	9.39	4.74	8.02	5.82
Hs-miR-885-5p-1	2.22	8.97	3.63	7.58	2.84
Hs-miR-886-3p-1	N/A	12.76	6.88	12.02	N/A
Hs-miR-886-5p-1	N/A	11.94	7.55	10.75	N/A
Hs-miR-887-2	2.53	7.70	3.97	6.89	4.10
Hs-miR-888*-1	N/A	N/A	N/A	N/A	N/A
Hs-miR-888-1	-2.07	10.85	0.80	9.51	-2.30
Hs-miR-889-1	N/A	13.50	N/A	13.66	N/A
Hs-miR-890-1	2.28	10.47	4.84	8.99	1.79
Hs-miR-891a-1	5.25	7.92	2.62	4.83	4.70
Hs-miR-891b-1	N/A	13.18	N/A	12.26	N/A
Hs-miR-892a-1	N/A	12.47	6.10	11.37	N/A
Hs-miR-892b-1	6.08	6.78	4.93	5.62	N/A
Hs-miR-920-1	1.67	10.22	4.86	9.19	2.65
Hs-miR-921-1	2.84	9.93	4.23	8.73	2.73
Hs-miR-922-1	5.38	11.07	4.96	11.61	5.75
Hs-miR-924-1	5.68	11.36	7.04	10.80	5.53
Hs-miR-933-1	-6.68	2.96	-3.98	1.51	-5.70
Hs-miR-934-1	3.76	11.16	6.36	9.45	3.98
Hs-miR-935-1	N/A	14.70	N/A	14.67	N/A
Hs-miR-936-1	5.62	4.93	1.79	3.41	N/A
Hs-miR-937-1	2.64	9.83	4.71	8.24	3.23
Hs-miR-938-1	N/A	15.18	N/A	N/A	N/A
Hs-miR-939-1	4.01	11.77	6.36	10.54	3.78
Hs-miR-941-1	2.30	9.85	4.14	8.74	1.92
Hs-miR-942-1	5.27	10.20	5.82	8.46	5.40
Hs-miR-943-1	1.46	9.40	3.98	8.30	1.78
Hs-miR-944-1	N/A	14.55	N/A	13.41	N/A
Hs-miR-1178-1	N/A	12.58	3.04	11.83	-4.04
Hs-miR-1179-1	N/A	N/A	N/A	N/A	N/A
Hs-miR-1180-1	N/A	10.30	6.18	9.02	N/A
Hs-miR-1182-1	N/A	11.69	6.90	11.36	N/A
Hs-miR-1183-1	N/A	7.59	3.53	4.96	N/A
Hs-miR-1184-1	N/A	12.91	8.50	13.52	N/A
Hs-miR-1185-1	N/A	N/A	N/A	N/A	N/A
Hs-miR-1197-1	N/A	N/A	N/A	N/A	N/A
Hs-miR-1200-1	N/A	12.62	N/A	11.75	N/A
Hs-miR-1201-1	N/A	10.99	N/A	12.72	N/A
Hs-miR-1202-1	N/A	8.20	4.82	7.11	N/A
Hs-miR-1203-1	N/A	10.47	6.94	9.81	N/A
Hs-miR-1204-1	N/A	15.25	6.02	N/A	N/A
Hs-miR-1205-1	N/A	12.48	8.30	12.34	N/A
Hs-miR-1206-1	N/A	N/A	N/A	N/A	N/A
Hs-miR-1207-3p-1	N/A	14.12	N/A	13.76	N/A
Hs-miR-1207-5p-1	N/A	5.48	1.95	4.25	-2.21
Hs-miR-1208-1	N/A	7.78	5.32	6.86	N/A
Hs-miR-1224-3p-1	N/A	12.03	7.45	11.09	N/A
Hs-miR-1224-5p-1	N/A	7.74	4.45	6.48	N/A
Hs-miR-1225-5p-1	N/A	9.75	6.33	9.13	N/A
Hs-miR-1226*-1	N/A	9.69	5.64	8.61	N/A
Hs-miR-1226-1	N/A	13.14	5.70	10.82	-1.67
Hs-miR-1227-1	N/A	10.01	4.40	8.58	-0.69
Hs-miR-1228*-2	N/A	8.38	4.18	7.12	N/A
Hs-miR-1228-1	N/A	5.46	-0.22	4.66	-5.96
Hs-miR-1229-1	N/A	9.47	3.67	7.75	-0.66
Hs-miR-1231-1	N/A	9.19	6.48	9.08	0.32
Hs-miR-1233-1	N/A	7.52	1.99	6.63	-2.08
Hs-miR-1234-1	N/A	5.02	-4.09	4.09	-10.56
Hs-miR-1236-1	N/A	12.32	6.64	10.89	-1.01
Hs-miR-1237-1	N/A	10.71	3.95	9.19	-1.59
Hs-miR-1238-1	N/A	11.59	5.82	9.08	-1.49
Hs-miR-1243-1	N/A	13.13	8.36	12.26	N/A
Hs-miR-1244-1	N/A	7.64	3.12	6.27	N/A
Hs-miR-1245-1	N/A	13.29	5.87	13.96	1.61
Hs-miR-1246-1	N/A	N/A	N/A	N/A	N/A
Hs-miR-1247-1	N/A	8.59	4.32	6.74	N/A
Hs-miR-1248-1	N/A	9.30	N/A	12.20	1.13
Hs-miR-1249-1	N/A	10.88	4.82	9.99	-0.92
Hs-miR-1250-1	N/A	12.15	N/A	12.08	0.65
Hs-miR-1251-1	N/A	N/A	N/A	N/A	N/A
Hs-miR-1252-1	N/A	N/A	N/A	N/A	N/A
Hs-miR-1253-1	N/A	10.63	5.71	9.93	2.49
Hs-miR-1254-1	N/A	11.53	4.85	10.31	1.76
Hs-miR-1255a-1	N/A	N/A	2.52	N/A	N/A
Hs-miR-1255b-1	N/A	9.41	7.15	8.63	N/A
Hs-miR-1256-1	N/A	15.33	8.56	13.41	N/A
Hs-miR-1257-1	N/A	10.84	4.95	10.34	0.38
Hs-miR-1258-1	N/A	13.33	5.48	14.32	N/A
Hs-miR-1259-1	N/A	12.69	N/A	N/A	3.86
Hs-miR-1260-1	N/A	3.35	-0.71	3.74	-2.91
Hs-miR-1261-1	N/A	N/A	N/A	N/A	N/A
Hs-miR-1262-1	N/A	13.51	N/A	12.62	-4.47
Hs-miR-1263-1	N/A	14.23	8.80	9.09	1.64
Hs-miR-1264-1	N/A	N/A	N/A	N/A	N/A
Hs-miR-1265-1	N/A	10.11	6.46	9.19	3.76
Hs-miR-1266-1	N/A	11.91	5.42	11.74	0.32
Hs-miR-1267-1	N/A	12.48	N/A	10.95	N/A
Hs-miR-1269-1	N/A	13.23	N/A	12.16	-0.36
Hs-miR-1270-1	N/A	13.60	7.47	12.74	0.48
Hs-miR-1271-1	N/A	12.40	6.21	12.23	-4.49
Hs-miR-1272-1	N/A	14.44	N/A	N/A	0.31
Hs-miR-1273-1	N/A	8.69	6.84	7.73	-2.29
Hs-miR-1274a-1	N/A	7.96	2.68	6.36	-1.12
Hs-miR-1275-1	N/A	7.53	3.97	7.41	N/A
Hs-miR-1276-1	N/A	13.43	N/A	12.34	-1.90
Hs-miR-1278-1	N/A	N/A	N/A	N/A	1.77
Hs-miR-1279-1	N/A	N/A	N/A	N/A	3.61
Hs-miR-1281-1	N/A	7.61	-0.77	5.76	-5.64
Hs-miR-1282-1	N/A	13.58	N/A	12.98	-1.03
Hs-miR-1283-1	N/A	11.70	4.76	11.43	-1.93
Hs-miR-1284-1	N/A	N/A	N/A	N/A	N/A
Hs-miR-1285-1	N/A	9.94	5.81	8.88	-3.87
Hs-miR-1286-1	N/A	10.22	4.48	9.77	5.14
Hs-miR-1287-1	N/A	12.26	6.07	10.90	1.57
Hs-miR-1288-1	N/A	12.67	N/A	11.81	1.46
Hs-miR-1289-1	N/A	12.28	6.40	10.03	6.60
Hs-miR-1290-1	N/A	6.90	4.25	7.05	-1.68
Hs-miR-1291-1	N/A	10.45	7.21	11.24	1.10
Hs-miR-1292-1	N/A	11.24	6.01	10.93	N/A
Hs-miR-1293-1	N/A	11.74	6.41	11.05	N/A
Hs-miR-1294-1	N/A	13.70	N/A	13.96	3.11
Hs-miR-1295-1	N/A	12.07	N/A	10.91	0.61
Hs-miR-1296-1	N/A	10.80	5.42	9.22	-1.65
Hs-miR-1297-1	N/A	15.26	N/A	14.37	N/A
Hs-miR-1298-1	N/A	14.72	N/A	14.18	-1.93
Hs-miR-1299-1	N/A	10.51	6.11	9.67	-0.31
Hs-miR-1300-1	N/A	7.04	3.64	6.51	N/A
Hs-miR-1301-1	N/A	10.08	2.32	9.44	-2.68
Hs-miR-1302-1	N/A	N/A	N/A	N/A	N/A
Hs-miR-1303-1	N/A	7.05	5.22	5.99	-0.26
Hs-miR-1304-1	N/A	12.53	N/A	11.15	0.55
Hs-miR-1305-1	N/A	N/A	N/A	N/A	N/A
Hs-miR-1306-1	N/A	8.23	3.56	7.84	-0.33
Hs-miR-1307-1	N/A	7.41	1.80	6.22	-0.85
Hs-miR-1308-1	N/A	6.62	-1.00	4.16	N/A
Hs-miR-1321-1	N/A	12.45	6.94	11.57	N/A
Hs-miR-1322-1	N/A	8.42	5.86	7.91	-3.81
Hs-miR-1323-1	N/A	13.17	7.35	13.31	2.38
Hs-miR-1324-1	N/A	12.85	N/A	11.83	N/A
Hs-miR-1468-1	N/A	13.44	N/A	12.78	1.26
Hs-miR-1471-1	N/A	8.80	5.70	7.69	N/A
Hs-miR-1537-1	N/A	N/A	N/A	N/A	N/A
Hs-miR-1538-1	N/A	9.54	4.93	8.67	3.65
Hs-miR-1539-1	N/A	12.24	N/A	12.10	N/A
Hs-miR-1825-1	N/A	11.03	5.24	9.76	-0.11
Hs-miR-1826-1	N/A	6.61	3.26	6.40	0.96
Hs-miR-1827-1	N/A	11.11	3.90	9.50	N/A
Hs-miR-1908-1	N/A	6.87	2.20	6.26	N/A
Hs-miR-1909*-1	N/A	7.49	4.33	5.21	N/A
Hs-miR-1910-1	N/A	6.19	1.09	5.29	N/A
Hs-miR-1911*-1	N/A	14.18	N/A	12.25	N/A
Hs-miR-1911-1	N/A	13.07	N/A	13.04	N/A
Hs-miR-1912-1	N/A	12.40	5.80	11.76	N/A
Hs-miR-1913-1	N/A	8.72	1.48	8.12	N/A
Hs-miR-1914*-1	N/A	11.55	N/A	10.18	N/A
Hs-miR-1914-1	N/A	7.54	2.12	7.79	N/A
Hs-miR-1915*-1	N/A	9.96	5.62	8.66	N/A
Hs-miR-1972-1	N/A	4.25	1.96	2.68	N/A
Hs-miR-1973-1	N/A	1.96	-5.57	4.13	N/A
Hs-miR-1974-1	N/A	2.78	-5.59	4.60	N/A
Hs-miR-1975-1	N/A	4.63	-2.61	4.30	-0.01
Hs-miR-1976-1	N/A	10.89	5.50	6.88	N/A
Hs-miR-1977-1	N/A	4.80	-3.07	6.89	N/A
Hs-miR-1978-1	N/A	1.29	-5.26	3.44	N/A
Hs-miR-1979-1	N/A	1.57	-6.27	1.22	N/A
Hs-miR-2052-1	N/A	N/A	N/A	N/A	N/A
Hs-miR-2054-1	N/A	N/A	N/A	N/A	N/A
Hs-miR-2110-1	N/A	9.80	4.55	8.30	N/A
Hs-miR-2113-1	N/A	10.78	N/A	9.75	N/A
